# Supplementary material
Source: PubMed Central journal article supplement (PMC3349364)
Supplement: legends.pdf [file legends.pdf]

**Supplementary Fig 1.** Effects of dopamine on total eNOS expression in sham (n=5); LPS (n=5); dopamine (n=5) and dopamine+LPS treated (n=5) murine model of lung injury. The histology slides were Immunostained with total eNOS antibody from wild type mice (Supplementary Fig 1a). Quantitative analysis of immunostained slides was performed using metamorph software (more than three slides per group, n=5; Supplementary Fig. 1b). All samples were taken after 24h LPS challenge.

**Supplementary Fig 2.** Effects of dopamine on eNOS activation in D2DR knockout mice. The histology slides were immunostained with phospho-eNOS (S1177) antibody from homozygously (-/-, n=5) deleted mice treated with LPS alone (n=5) or with dopamine+LPS (Supplementary Fig 2a, n=5). Quantitative analysis of immunostained slides was performed using metamorph software (more than three slides per group; Supplementary Fig. 2b, n=5).
