# Supplementary material
Source: PubMed Central journal article supplement (PMC3349364)

# Supplementary Figure 1

1a

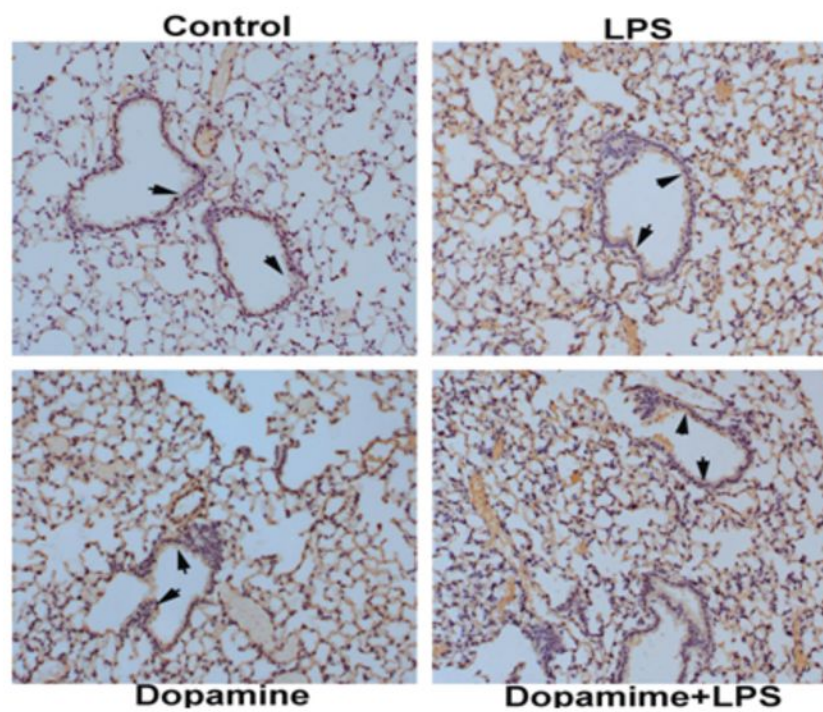

1b

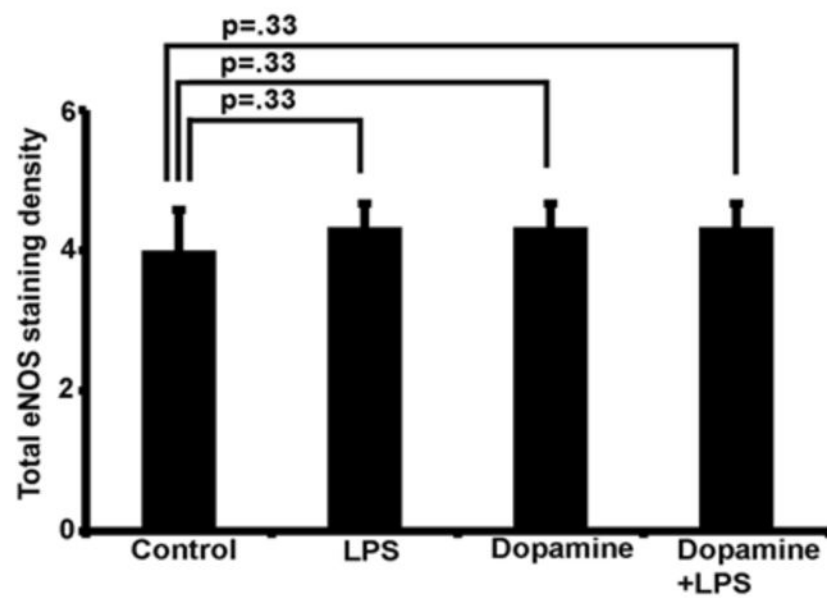

Supplement: figS1.pdf [file figS1.pdf]

# Supplementary Figure 2

2a

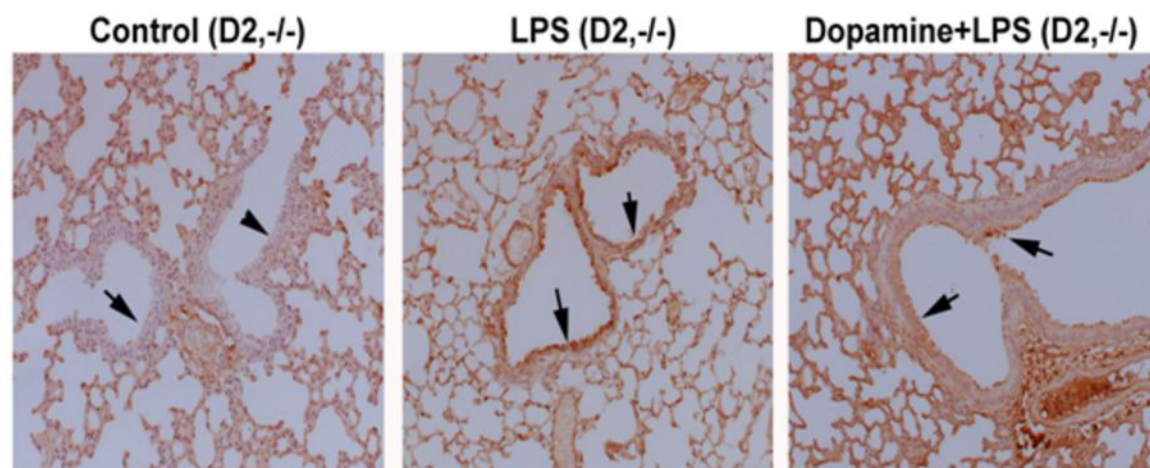

2b

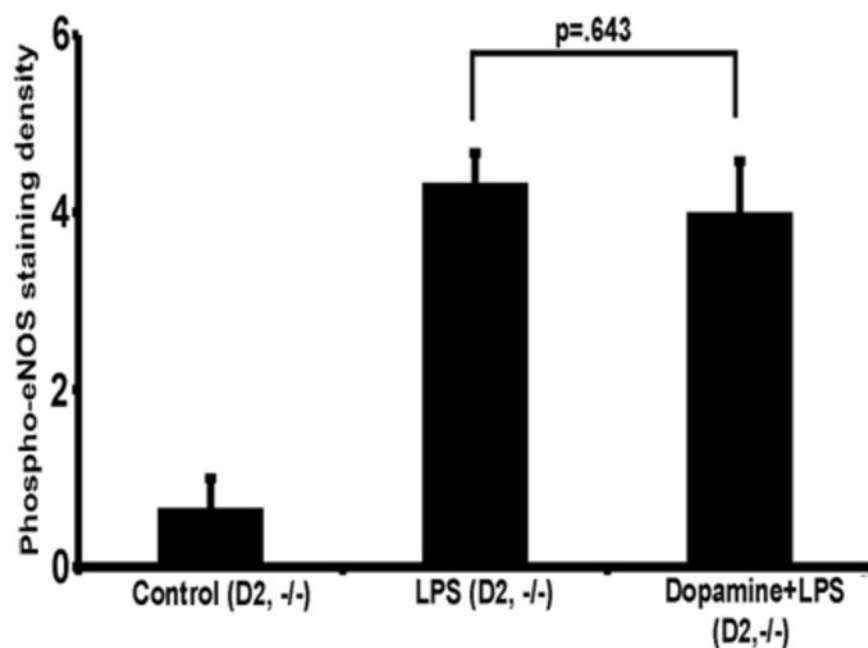

Supplement: figS2.pdf [file figS2.pdf]
